# Supplementary material for: Host species mediate distinct seed microbiome responses to restoration
Source: Research Square preprint supplement (doi:10.21203/rs.3.rs-8812586/v1), 2026-02-11
Supplement: Supplementary file 1 [file Figure S1.docx]

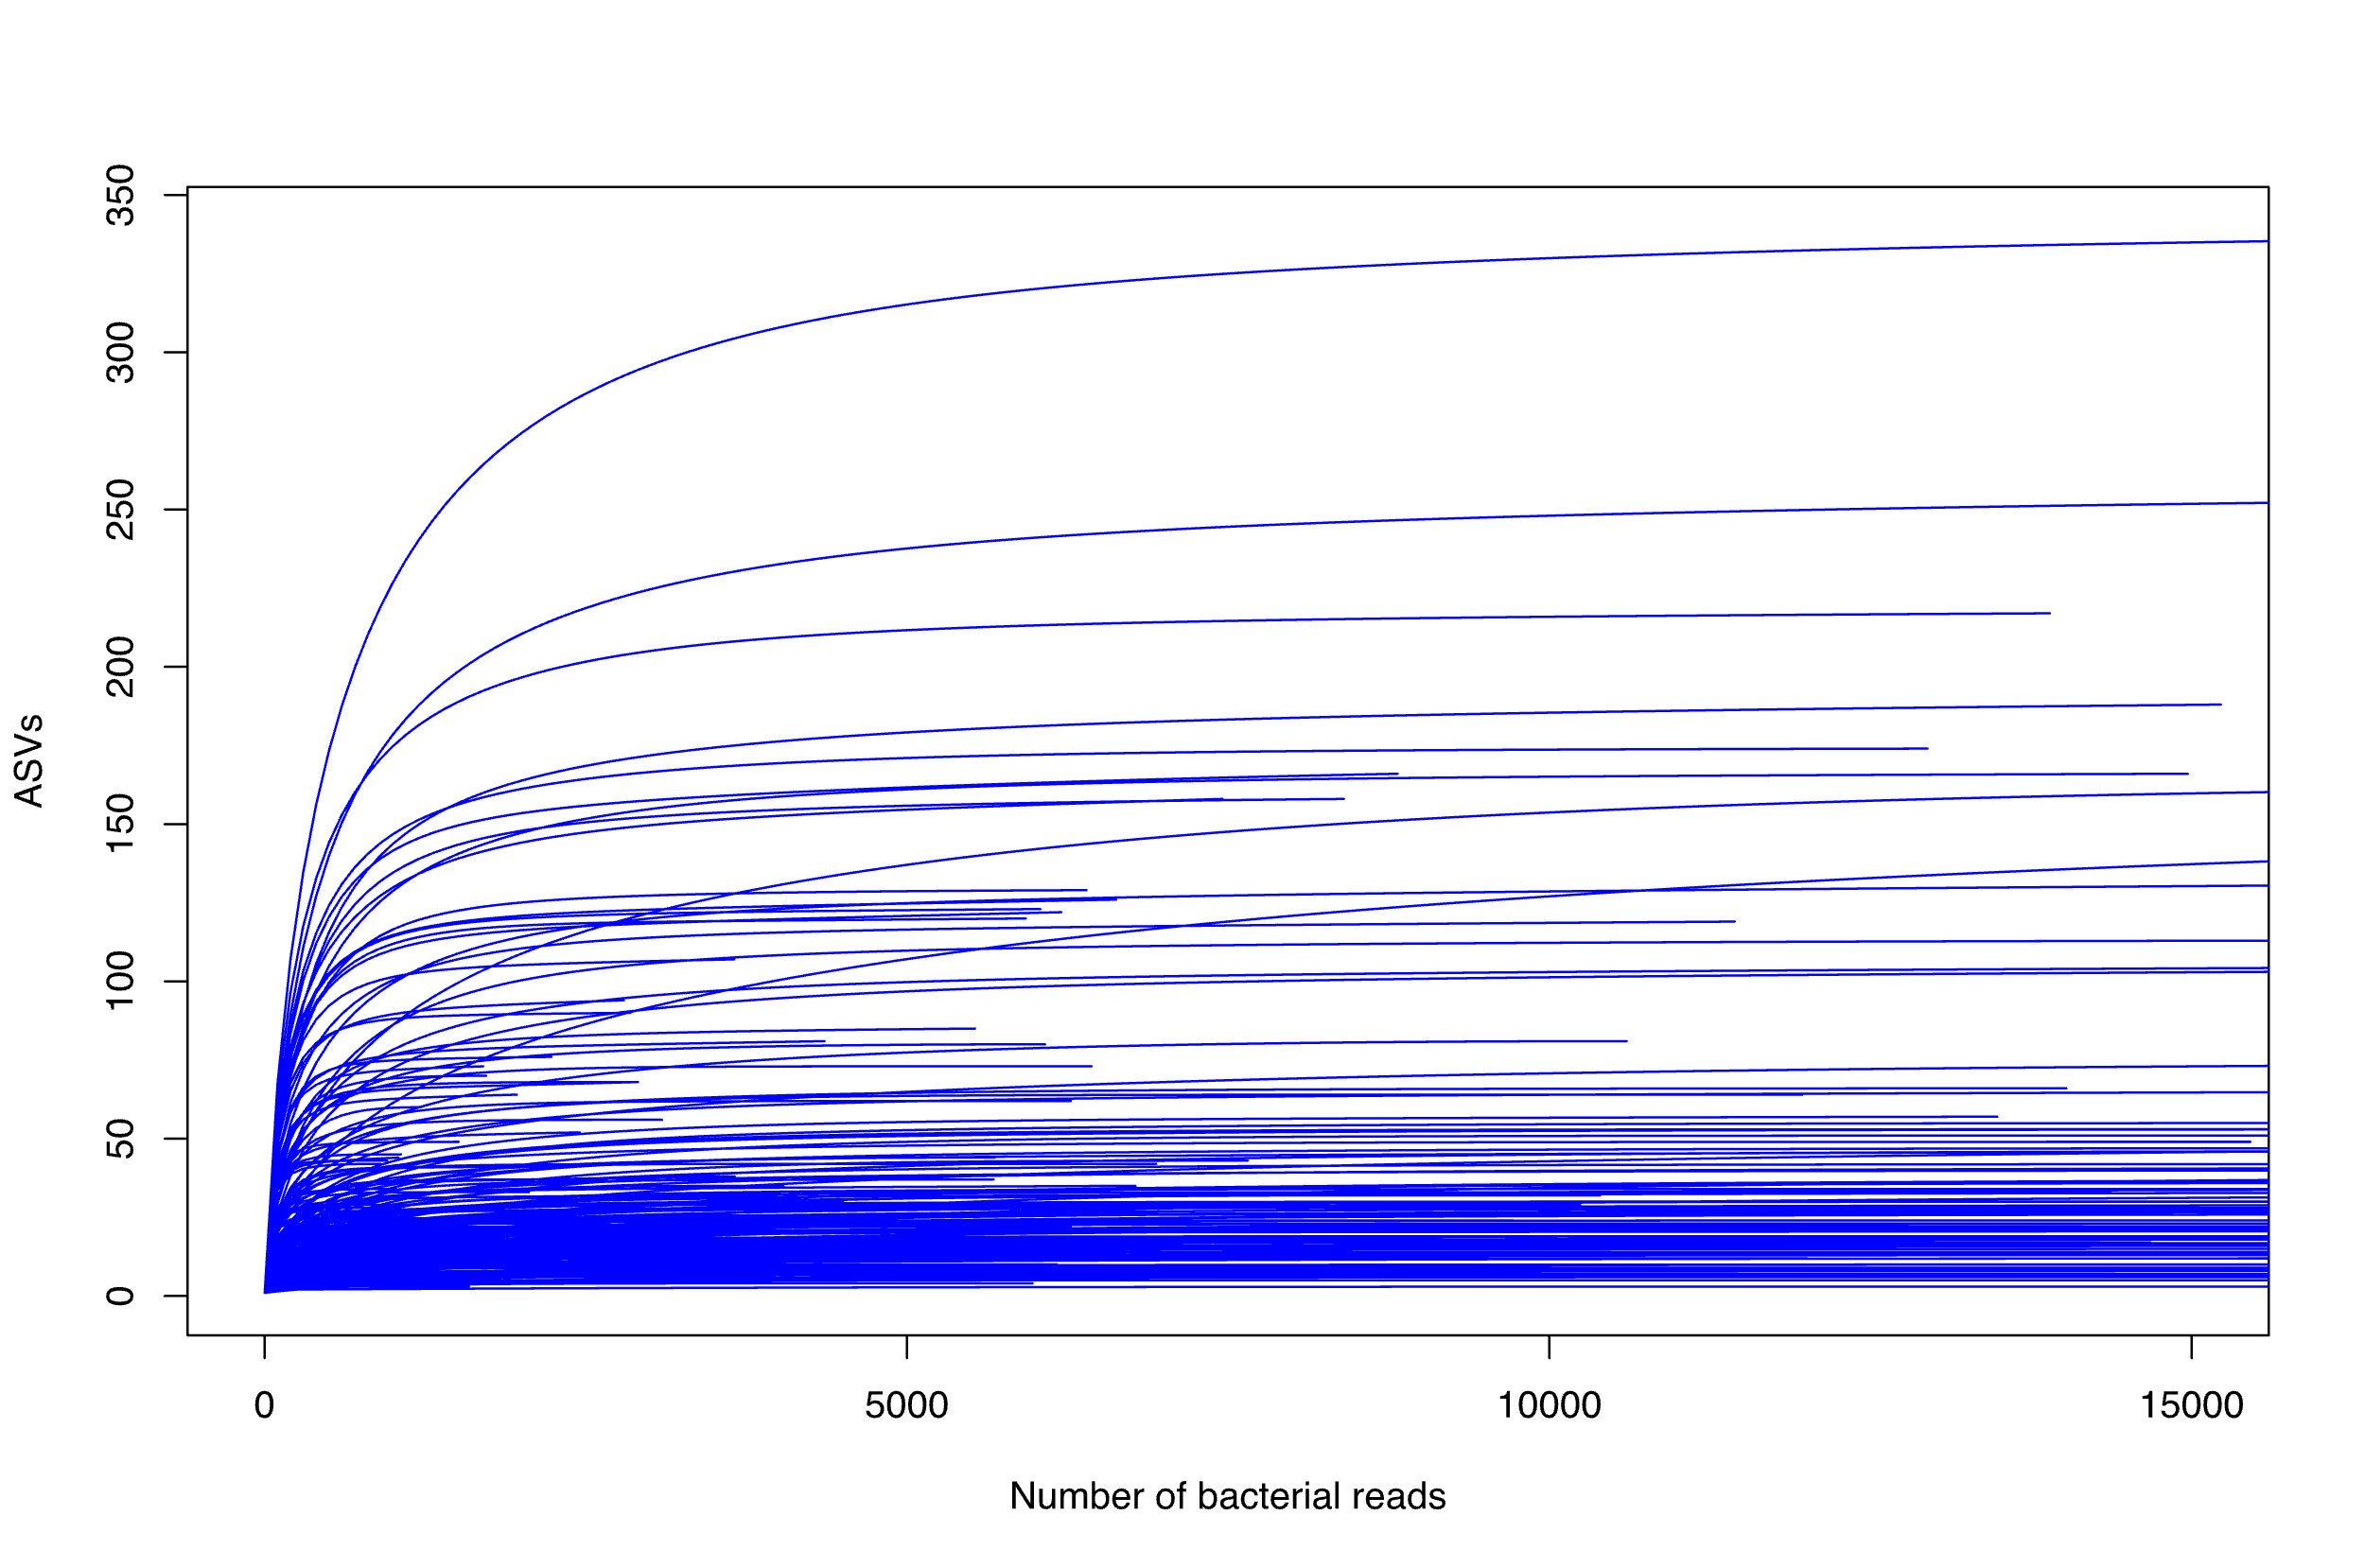


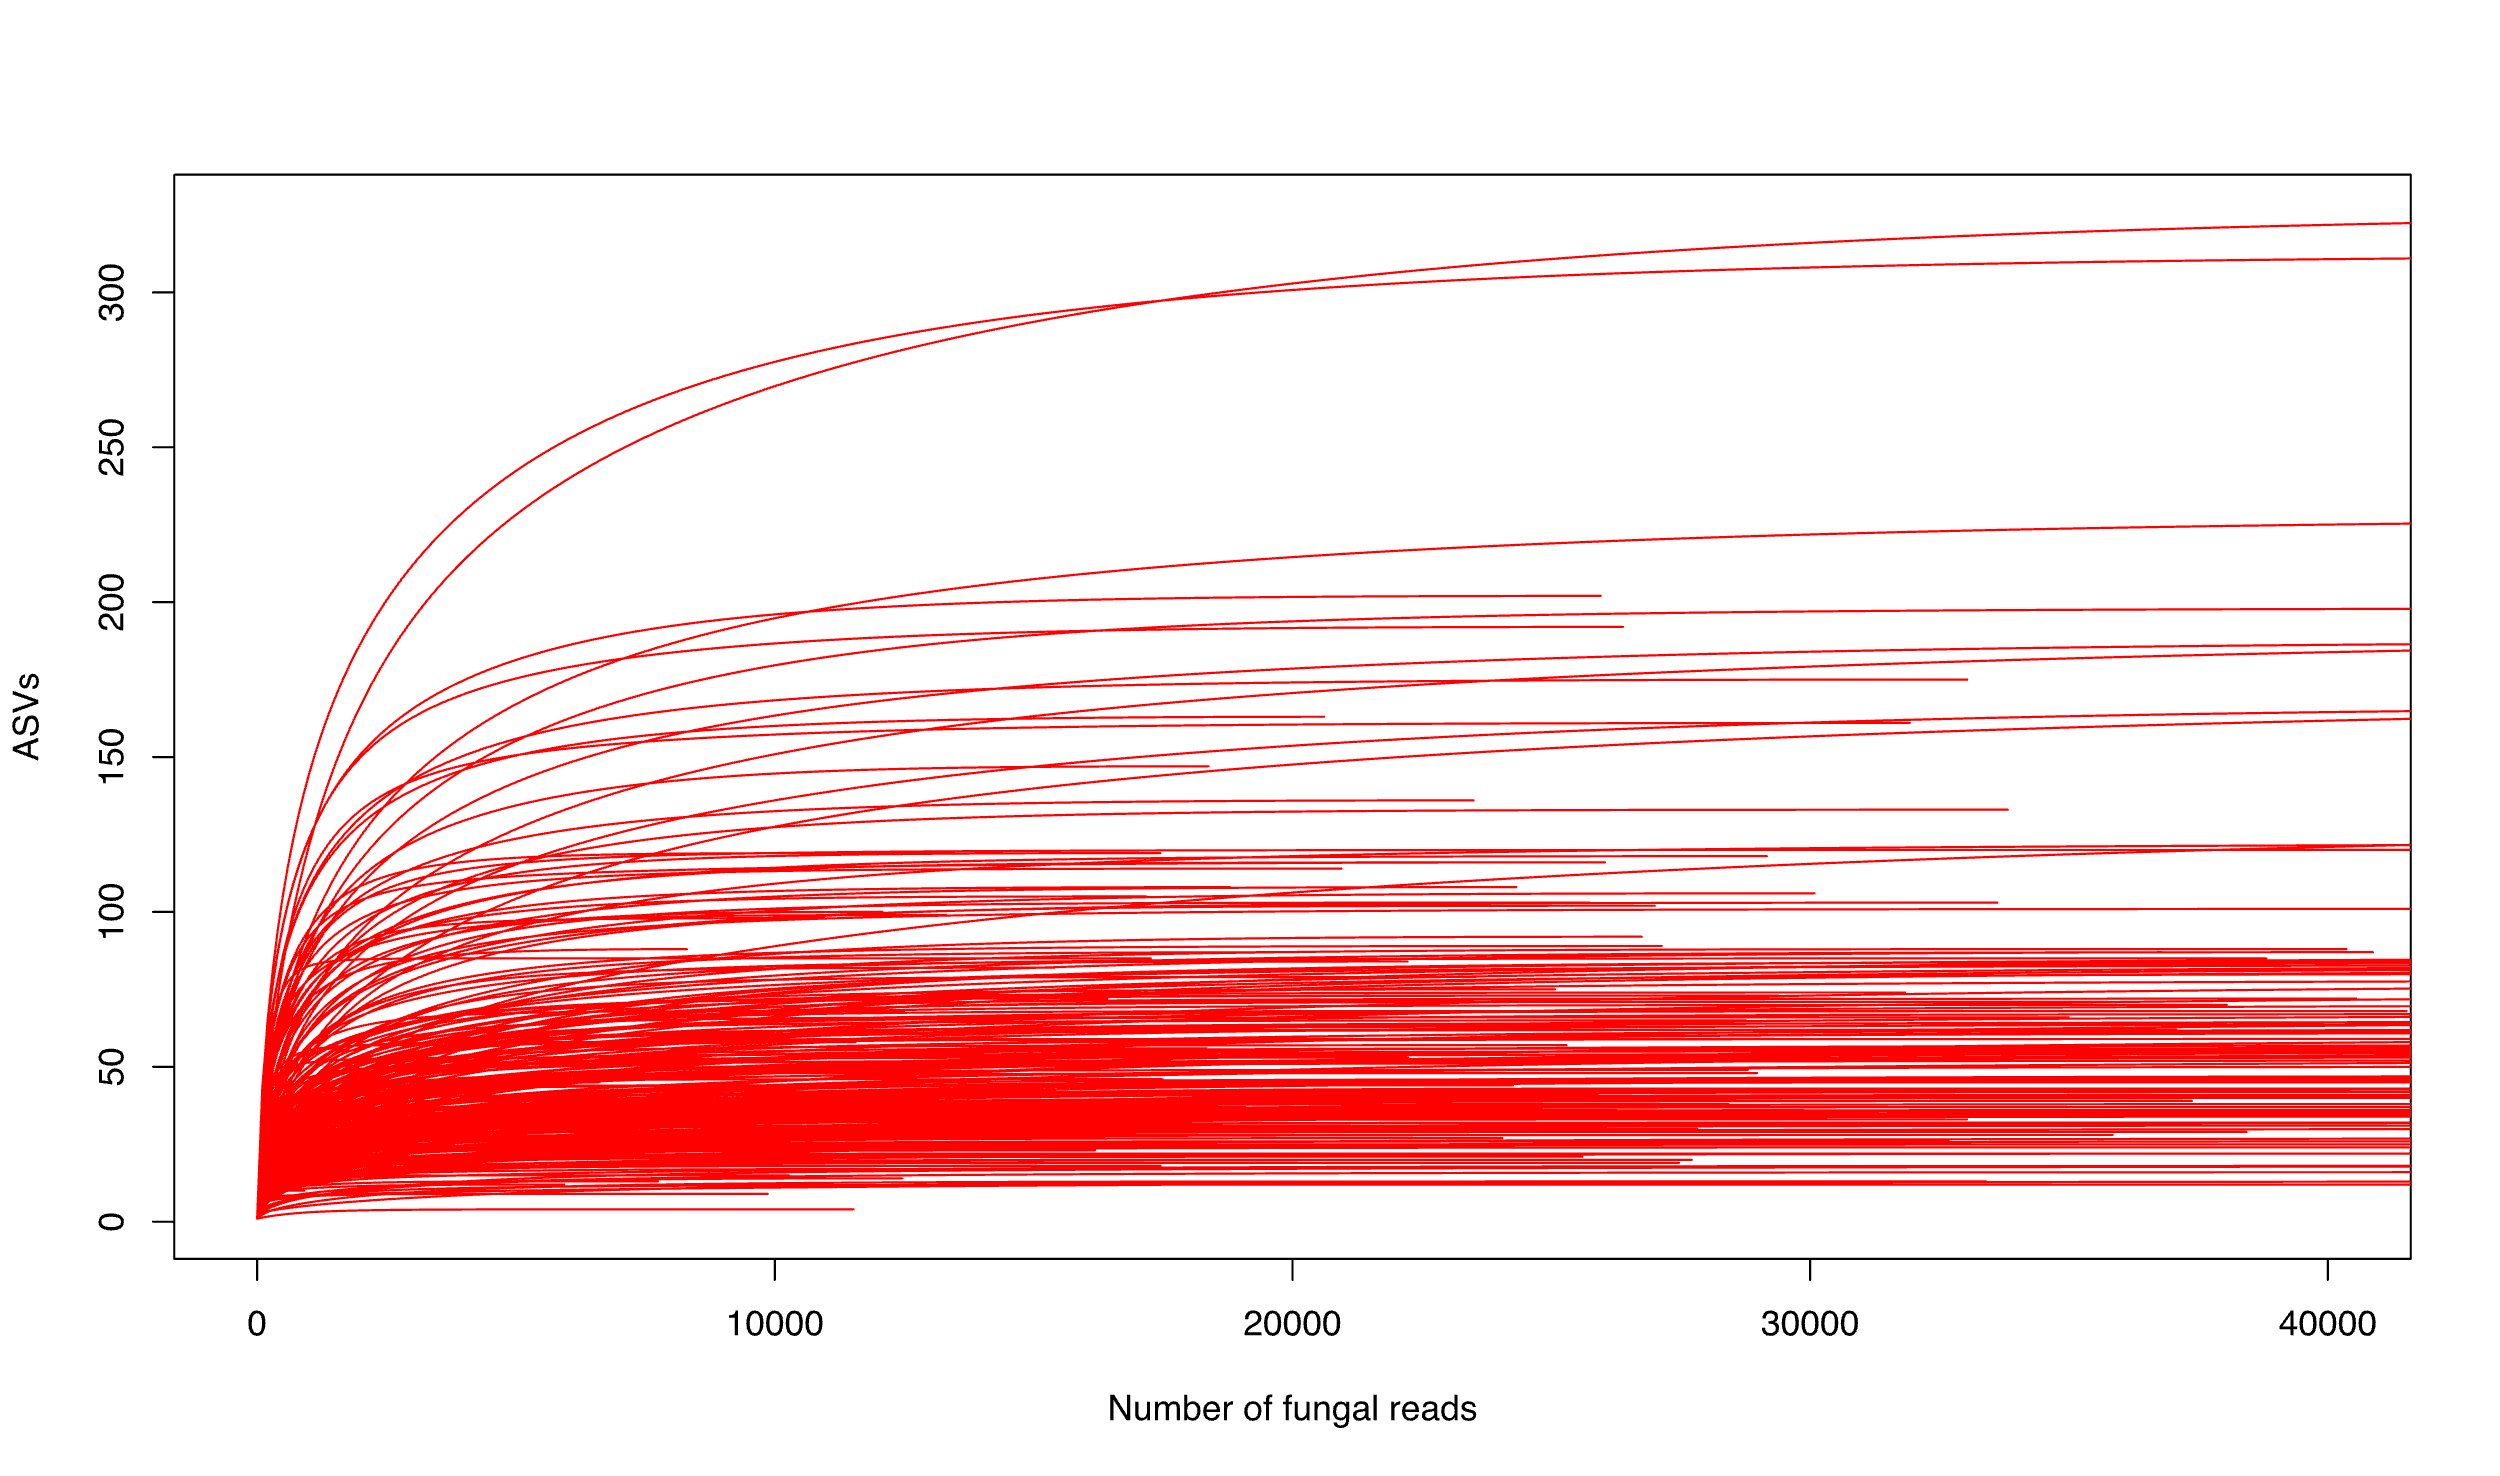


Figure S1. Rarefaction curves showing the sequencing depth and number of observed features (amplicon sequence variants, ASVs) of the samples sequenced on the MiSeq Illumina platform for (a) the 16S rRNA gene and (b) the ITS2 region. Each coloured line represents one sample.
