# Supplementary material for: Host species mediate distinct seed microbiome responses to restoration
Source: Research Square preprint supplement (doi:10.21203/rs.3.rs-8812586/v1), 2026-02-11
Supplement: Supplementary file 3 [file Table S1.docx]

| Table S1. Site details, plant community type and vegetation form (based on the NSW Vegetation Classification, DPIE, 2020) and location coordinates of restored and natural sites where seed was collected from *Melaleuca quinquenervia*, *Microlaena stipoides* and *Themeda triandra*. NP = national park, NR = nature reserve. | | | | | | |
| --- | --- | --- | --- | --- | --- | --- |
| **Host** | **Site** | **Plant Community Type** | **Vegetation Form** | **Site Type** | **Latitude** | **Longitude** | |
| *Melaleuca quinquenervia* | Budgewoi Dune Care | Estuarine Swamp Oak Twig Rush Forest | Forested Wetlands | Restored | -33.23802 | 151.5684755 | |
|  | Burrawang Reserve, Woy Woy | Umina Coastal Sand Woodland | Dry Sclerophyll Forests (Shrubby sub-formation) | Restored | -33.4981 | 151.3084 | |
|  | Mambo Wetlands | Coastal Sands Swamp Mahogany Rush Forest | Forested Wetlands | Restored | -32.72547 | 152.1040944 | |
|  | Novocastrian Reserve | Coastal Sands Swamp Mahogany Rush Forest | Forested Wetlands | Restored | -32.93180 | 151.707976 | |
|  | Soldiers Point Park | Coastal Sands Swamp Mahogany Rush Forest | Forested Wetlands | Restored | -32.73604 | 152.0853812 | |
|  | Colongra Swamp NR | Lower North Creekflat Mahogany Swamp Forest | Forested Wetlands | Natural | -33.20496 | 151.5481722 | |
|  | Crowdy Bay NP | Northern Melaleuca quinquenervia Swamp Forest | Forested Wetlands | Natural | -31.69863 | 152.791601 | |
|  | Hat Head  NP | Northern Sands Swamp Mahogany Shrubby Rush Forest | Forested Wetlands | Natural | -31.03003 | 153.0250251 | |
|  | Lake Innes NR | Northern Melaleuca quinquenervia Swamp Forest | Forested Wetlands | Natural | -31.50224 | 152.8982869 | |
|  | Limeburners Creek NP | Coastal Sands Swamp Mahogany Rush Forest | Forested Wetlands | Natural | -31.33082 | 152.9575479 | |
|  | Tomaree  NP | Coastal Sands Apple-Blackbutt Forest | Dry Sclerophyll Forests (Shrubby sub-formation) | Natural | -32.74757 | 152.1213281 | |
| *Microlaena stipoides* | Blue Gum Point, Yarralumla | - | Grassy Woodlands | Restored | -35.28352 | 149.127762 | |
|  | Burrawang Reserve, Woy Woy | Umina Coastal Sand Woodland | Dry Sclerophyll Forests (Shrubby sub-formation) | Restored | -33.49729 | 151.308359 | |
|  | Crest Reserve, Bankstown | Cumberland Shale Plains Woodland | Grassy Woodlands | Restored | -33.91136 | 150.995836 | |
|  | Elizabeth MacArthur Reserve, Camden | Cumberland Shale Plains Woodland | Grassy Woodlands | Restored | -34.081 | 150.6996 | |
|  | Garrad Reserve, Narrawallee | South Coast Sands Bangalay Forest | Dry Sclerophyll Forests (Shrubby sub-formation) | Restored | -35.3064 | 150.4673 | |
|  | Leacock Nature Reserve | Cumberland Shale Plains Woodland | Grassy Woodlands | Natural | -33.9518 | 150.9072 | |
|  | Tathra APZ, Panorama Drive | South Coast Foothills Dry Shrub Forest | Dry Sclerophyll Forests (Shrubby sub-formation) | Restored | -36.7239 | 149.9741 | |
|  | Wiseman’s Park, Keiraville | Illawarra Lowland Red Gum Grassy Forest | Grassy Woodlands | Restored | -34.419 | 150.8827 | |
|  | Bournda NP North Tura | Far Southeast Headland Scrub | Heathlands | Natural | -36.82828 | 149.935058 | |
|  | Jervis Bay NP | Shoalhaven Lowland Bloodwood Shrub Forest | Dry Sclerophyll Forests (Shrubby sub-formation) | Natural | -35.06592 | 150.638115 | |
|  | Meroo NP | South Coast Lowland Shrub-Grass Forest | Wet Sclerophyll Forests (Grassy sub-formation) | Natural | -35.3944 | 150.4317 | |
|  | Mount Pleasant |  | Grassy Woodlands | Natural | -35.29634 | 149.159899 | |
|  | Munmorah SCA | Lower North Coast Headland Clay Heath | Heathlands | Natural | -33.19596 | 151.621238 | |
|  | Noorumba Reserve, Rosemeadow | Cumberland Shale Plains Woodland | Grassy Woodlands | Natural | -34.11307 | 150.791854 | |
|  | Wyrrabalong North NP | Coastal Sands Apple-Blackbutt Forest | Dry Sclerophyll Forests (Shrubby sub-formation) | Natural | -33.30013 | 151.532938 | |
| *Themeda triandra* | Catherine Hill Revegetation Area | Hunter Coast Lowland Apple-Bloodwood Forest | Dry Sclerophyll Forests (Shrubby sub-formation) | Restored | -32.73604 | 152.085412 | |
|  | Crest Reserve Bankstown | Cumberland Shale Plains Woodland | Grassy Woodlands | Restored | -33.91136 | 150.995836 | |
|  | Elizabeth Macarthur Reserve, Camden | Cumberland Shale Plains Woodland | Grassy Woodlands | Restored | -34.081 | 150.6996 | |
|  | Jesmond Park | Hunter Coast Lowland Spotted Gum Dry Forest | Dry Sclerophyll Forests (Shrubby sub-formation) | Restored | -32.90818 | 151.697962 | |
|  | Norah Head | Coastal Sands Littoral Scrub-Forest | Dry Sclerophyll Forests (Shrubby sub-formation) | Restored | -33.30057 | 151.532811 | |
|  | Short Point Reserve, Merimbula | Far Southeast Headland Scrub | Heathlands | Restored | -36.88462 | 149.932149 | |
|  | Tathra APZ, Panorama Drive | South Coast Foothills Dry Shrub Forest | Dry Sclerophyll Forests (Shrubby sub-formation) | Restored | -36.7239 | 149.9741 | |
|  | Yarramundi Grasslands | - | Native Grasslands | Restored | -35.29146 | 149.082151 | |
|  | Colongra Swamp NR | Hunter Coast Lowland Scribbly Gum Forest | Dry Sclerophyll Forests (Shrubby sub-formation) | Natural | -33.2093 | 151.5501 | |
|  | Duesbury Point, Dalmeny | Far Southeast Headland Scrub | Heathlands | Natural | -36.1781 | 150.131368 | |
|  | Jervis Bay NP | Shoalhaven Lowland Bloodwood Shrub Forest | Dry Sclerophyll Forests (Shrubby sub-formation) | Natural | -35.0659 | 150.638115 | |
|  | Meroo NP | South Coast Lowland Shrub-Grass Forest | Wet Sclerophyll Forests (Grassy sub-formation) | Natural | -35.3944 | 150.4317 | |
|  | Mount Pleasant | - | Grassy Woodlands | Natural | -35.2963 | 149.159899 | |
|  | Munmorah SCA | Lower North Coast Headland Clay Heath | Heathlands | Natural | -33.1959 | 151.621238 | |
|  | Noorumba Reserve, Rosemeadow | Cumberland Shale Plains Woodland | Grassy Woodlands | Natural | -34.1130 | 150.791854 | |
