# Supplementary material for: Host species mediate distinct seed microbiome responses to restoration
Source: Research Square preprint supplement (doi:10.21203/rs.3.rs-8812586/v1), 2026-02-11
Supplement: Supplementary file 5 [file Table S3.docx]

Table S3. PerMANOVA summary tables and pairwise comparisons for changes in community composition between site types (natural and restored) and host species and pairwise tests between site types for each host due to a positive interaction term.

| (a) Bacterial communities PERMANOVA, Model = HostSpecies+SiteType+Host*SiteType | | | | | | |
| --- | --- | --- | --- | --- | --- | --- |
| Source | Df | SumOfSqs | R2 | F | Pr(>F) |  |
| Host | 2 | 12.554 | 0.0934 | 17.0241 | 0.001 | * |
| SiteType | 1 | 1.899 | 0.01413 | 5.1501 | 0.001 | * |
| HostxSiteType | 2 | 2.708 | 0.02015 | 3.6721 | 0.001 | * |
| Res | 318 | 117.254 | 0.87233 |  |  |  |
| Total | 323 | 134.416 | 1 |  |  |  |
|  |  |  |  |  |  |  |

| (b) Bacterial communities pairwise comparisons between site types | | | | |
| --- | --- | --- | --- | --- |
| combination | SumsOfSqs | F.Model | R2 | P.value.corrected |
| Melaleuca_quinquenervia_Natural <-> Melaleuca_quinquenervia_Restored | 1.773 | 4.245 | 0.04811 | 0.001 |
| Microlaena_stipoides_Natural <-> Microlaena_stipoides_Restored | 1.71 | 4.687 | 0.03820 | 0.001 |
| Themeda_triandra_Natural <-> Themeda_triandra_Restored | 0.839 | 2.48 | 0.02097 | 0.001 |

| (c) Fungal communities PERMANOVA, Model = HostSpecies+SiteType+Host*SiteType | | | | | | |
| --- | --- | --- | --- | --- | --- | --- |
| Source | Df | SumOfSqs | R2 | F | Pr(>F) |  |
| Host | 2 | 14.207 | 0.1017 | 19.875 | 0.001 | *** |
| SiteType | 1 | 2.337 | 0.01673 | 6.5401 | 0.001 | *** |
| HostxSiteType | 2 | 4.849 | 0.03471 | 6.784 | 0.001 | *** |
| Residual | 331 | 118.3 | 0.84685 |  |  |  |
| Total | 336 | 139.693 | 1 |  |  |  |

| (d) Fungal communities pairwise comparisons between site types | | | | |
| --- | --- | --- | --- | --- |
| combination | SumsOfSqs | F.Model | R2 | P.value.corrected |
| Melaleuca_quinquenervia_Natural <-> Melaleuca_quinquenervia_Restored | 4.62533992 | 14.147 | 0.12961 | 0.001 |
| Microlaena_stipoides_Natural <-> Microlaena_stipoides_Restored | 1.52981706 | 4.037 | 0.03281 | 0.001 |
| Themeda_triandra_Natural <-> Themeda_triandra_Restored | 1.03147268 | 2.863 | 0.02388 | 0.001 |
